# Supplementary material for: Survey of Thai Physicians’ Practice in Pediatric Septic Shock
Source: MDPI journal article supplement (doi:10.3390/children11050597), 2024-05-15
Supplement: s1 [file s1]

## Supplement material S1

### Participant Questionnaire: Survey on the Management of Pediatric Sepsis and Septic Shock among Thai Physicians

#### Part 1: General Information

- Gender: ☐ Male ☐ Female ☐ Prefer not to disclose ☐ Other: \_\_\_\_\_

- Years of Experience as a Physician

- ☐ 0-1 years ☐ 1-2 years ☐ 2-3 years  
☐ 3-5 years ☐ 5-10 years ☐ More than 10 years  
☐ Prefer not to disclose

- Medical specialist

- ☐ General Practice ☐ Pediatrics  
☐ Prefer not to disclose ☐ Other: \_\_\_\_\_

- Current Professional Role

- ☐ Intern or General Practitioner (GP) ☐ Resident or clinical fellow  
☐ Pediatric Specialty Physician or Faculty Staff  
☐ Prefer not to disclose ☐ Other: \_\_\_\_\_

- Hospital Type Where You Work

- ☐ Primary care center ( $\leq 30$  beds)  
☐ Secondary care center ( $> 30$  beds)  
☐ Tertiary care center  
☐ Super tertiary care center  
☐ Private Hospital  
☐ Other: \_\_\_\_\_

- Geographical Region of Your Hospital

- ☐ Bangkok      ☐ Central Region      ☐ Northern Region  
☐ Southern Region      ☐ Eastern Region      ☐ Northeastern Region  
☐ Western Region

- Have you participated in any training or studied about the management of sepsis/septic shock in children?

- ☐ Yes      ☐ No

## Part 2: Survey on Practices for Treating Pediatric Sepsis and Septic Shock

Please answer the survey truthfully.

1. When was the last time you treated a child with sepsis or septic shock?

- ☐ Within the past week      ☐ Within the past month  
☐ Within the past 3 months      ☐ Within the past 6 months  
☐ Within the past year      ☐ More than a year ago  
☐ Never treated a child with sepsis or septic shock

2. On average, how many patients did you diagnose with sepsis or septic shock per month in the past year?

- ☐ 1-2 patients per month      ☐ 2-5 patients per month  
☐ 5-10 patients per month      ☐ 10-15 patients per month  
☐ More than 15 patients per month

3. For a 6-year-old boy weighing 20 kg with no prior illnesses who was injured playing with friends in the park two days ago and now has a pus-filled wound on his leg,

how long did it take to screen this patient until the doctor examined him at your hospital?

- ☐ 5 minutes      ☐ 15 minutes      ☐ 30 minutes  
☐ 1 hour      ☐ 2 hours      ☐ Other: \_\_\_\_\_

4. Upon examining the patient described in question 3, a boy shows good consciousness, clear lungs, a wound with pus on the left leg, warm extremities, flash capillary refill, and bounding pulses, what do you consider the most important in the initial resuscitation of this patient?

- ☐ Broad-spectrum antibiotic      ☐ Appropriate fluid bolus  
☐ Wound dressing and sending      ☐ pus for culture  
☐ Dopamine infusion      ☐ Epinephrine infusion

5. How soon after admission does a patient like the one in question 3 receive a broad-spectrum empirical antibiotic in your hospital?

- ☐ 15 minutes      ☐ 30 minutes      ☐ 1 hour  
☐ 2 hours      ☐ More than 2 hours      ☐ Other: \_\_\_\_\_

6. For the patient in question 3, which fluid for resuscitation would you choose first?

- ☐ 5% Dextrose in saline      ☐ Normal saline      ☐ Ringer's lactate solution  
☐ 5% human Albumin      ☐ Blood component      ☐ Other: \_\_\_\_\_

7. What volume of fluid would you use for loading fluid resuscitation for the patient in question 3?

- ☐ 200 ml (10 ml/kg)      ☐ 300 ml (15 ml/kg)      ☐ 400 ml (20 ml/kg)  
☐ 500 ml (25 ml/kg)      ☐ 600 ml (30 ml/kg)      ☐ Other: \_\_\_\_\_

8. How would you administer the fluid in question 7 to the patient?

- ☐ IV bolus      ☐ IV in 5 min      ☐ IV in 10 min

- ☐ IV in 15 min      ☐ IV in 30 min      ☐ IV in 1 hr  
☐ IV in 2 hr      ☐ IV in 8 hr      ☐ IV in 24 hr  
☐ Per oral      ☐ Intraosseous  
☐ Fluid not required for this patient

9. After the first fluid administration for the patient in question 3, if the BP is measured again at 75/40 mmHg and HR at 156 bpm with no signs of fluid overload, what is the maximum initial fluid resuscitation volume you would use before deciding to administer inotropic/vasoactive agents?

- ☐ 400 ml (20 mL/kg)      ☐ 500 ml (25 mL/kg)      ☐ 600 ml (30 mL/kg)  
☐ 800 ml (40 mL/kg)      ☐ 1000 ml (50 mL/kg)      ☐ 1200 ml (60 mL/kg)  
☐ 1400 ml (70 mL/kg)      ☐ 1600 ml (80 mL/kg)      ☐ 1800 ml (90 mL/kg)  
☐ 2000 ml (100 mL/kg)      ☐ Other: \_\_\_\_

10. Which inotropic/vasoactive agents are available for use in your hospital? (Multiple answers possible)

- ☐ Dopamine      ☐ Dobutamine      ☐ Epinephrine  
☐ Norepinephrine      ☐ Milrinone      ☐ Levosimendan  
☐ Vasopressin      ☐ Terlipressin      ☐ Angiotensin  
☐ Enoximone      ☐ Other: \_\_\_\_

11. After administering the full volume of fluid in question 9, how soon after you order treatment does the patient typically receive inotropic/vasoactive agents in your hospital?

- ☐ 5 minutes      ☐ 15 minutes      ☐ 30 minutes  
☐ 1 hour      ☐ 2 hours      ☐ Other: \_\_\_\_

12. If a child patient has a BP of 70/30 mmHg and a HR of 160 bpm with warm extremities after initial fluid administration, which inotropic/vasoactive agent would you choose first?

- |                                         |                                     |                                      |
|-----------------------------------------|-------------------------------------|--------------------------------------|
| <input type="checkbox"/> Dopamine       | <input type="checkbox"/> Dobutamine | <input type="checkbox"/> Epinephrine |
| <input type="checkbox"/> Norepinephrine | <input type="checkbox"/> Milrinone  | <input type="checkbox"/> Other: ____ |

13. If a child patient has a BP of 60/40 mmHg and a HR of 160 bpm with cold extremities after initial fluid administration, which inotropic/vasoactive agent would you choose first?

- |                                         |                                     |                                      |
|-----------------------------------------|-------------------------------------|--------------------------------------|
| <input type="checkbox"/> Dopamine       | <input type="checkbox"/> Dobutamine | <input type="checkbox"/> Epinephrine |
| <input type="checkbox"/> Norepinephrine | <input type="checkbox"/> Milrinone  | <input type="checkbox"/> Other: ____ |

14. If a child patient has been stabilized initially with fluids and epinephrine at 0.3 mcg/kg/min and is now in the ICU with BP 112/65 mmHg, HR 130 bpm, cold extremities, and ScvO<sub>2</sub> < 70%, which inotropic/vasoactive agent would be most appropriate in this situation?

- |                                         |                                       |                                       |
|-----------------------------------------|---------------------------------------|---------------------------------------|
| <input type="checkbox"/> Dopamine       | <input type="checkbox"/> Dobutamine   | <input type="checkbox"/> Epinephrine  |
| <input type="checkbox"/> Norepinephrine | <input type="checkbox"/> Milrinone    | <input type="checkbox"/> Levosimendan |
| <input type="checkbox"/> Vasopressin    | <input type="checkbox"/> Terlipressin | <input type="checkbox"/> Angiotensin  |
| <input type="checkbox"/> Enoximone      | <input type="checkbox"/> Other: ____  |                                       |

15. During the treatment of a patient with sepsis/septic shock who has a urinary catheter placed, if the patient is not urinating, how long will you wait before considering referral to a pediatric nephrologist or deciding on further action?

- |                                  |                                  |                                      |
|----------------------------------|----------------------------------|--------------------------------------|
| <input type="checkbox"/> 1 hour  | <input type="checkbox"/> 2 hours | <input type="checkbox"/> 3 hours     |
| <input type="checkbox"/> 4 hours | <input type="checkbox"/> 5 hours | <input type="checkbox"/> 6 hours     |
| <input type="checkbox"/> 7 hours | <input type="checkbox"/> 8 hours | <input type="checkbox"/> Other: ____ |

16. What is the mortality rate for pediatric patients with sepsis/septic shock in your hospital?

☐ Less than 10%

☐ 10-20%

☐ 20-40%

☐ 40-60%

☐ 60-80%

☐ More than 80%

☐ Other: \_\_\_\_\_

17. Have you received training on pediatric sepsis/septic shock management during your training?

☐ Yes

☐ No

☐ Other: \_\_\_\_\_

18. Do you think there should be annual training on pediatric sepsis/septic shock management?

☐ Yes, it should be organized

☐ No, it should not be organized

☐ Other: \_\_\_\_\_

19. Are you able to access a central line in children (excluding umbilical vein catheters in newborns)?

☐ Yes

☐ No

☐ Other: \_\_\_\_\_

20. Who do you think should be able to access a central line in children? (Multiple answers possible)

☐ General Practitioners

☐ Family Medicine Physicians

☐ Emergency Medicine Physicians

☐ General Pediatricians

☐ Pediatric Specialists

☐ General Surgeons

☐ Pediatric Surgeons

☐ Anesthesiologists

☐ Other: \_\_\_\_\_

21. Comments or suggestions on managing pediatric sepsis/septic shock in your hospital

.....

22. Other comments or suggestions:

.....
